# Supplementary material
Source: PubMed Central journal article supplement (PMC6238190)
Supplement: blood862334-suppl1.pdf [file blood862334-suppl1.pdf]

| Source of data                                                                 | Therapies                                                                                                         | Patients<br>(n) | CR/m* (%)               | PR/m* (%)              | Response/m*<br>(%) | NR/m* (%)                | Treatment<br>Failure/m*<br>(%) |
|--------------------------------------------------------------------------------|-------------------------------------------------------------------------------------------------------------------|-----------------|-------------------------|------------------------|--------------------|--------------------------|--------------------------------|
| <b>All Therapies</b>                                                           |                                                                                                                   | <b>344</b>      | <b>125/414 (30)</b>     | <b>89/305 (29)</b>     | <b>33/150 (22)</b> | <b>180/461 (39)</b>      | <b>163/367 (44)</b>            |
| SLR-1st                                                                        | All Therapies                                                                                                     | 120             | 42/106 (40)             | 40/106 (38)            | NA                 | 24/106 (23)              | 47/109 (43)                    |
| SLR-2nd                                                                        | > All Therapies                                                                                                   | 41              | 15/40 (38)              | 17/40 (43)             | NA                 | 8/40 (20)                | 19/39 (49)                     |
| Siltux - Phase II<br>Toci - Open<br>label                                      | All Therapies (siltuximab, corticosteroids)<br>All Therapies (tocilizumab)                                        | 79<br>26        | 1/79 (1)<br>NA          | 17/79 (22)<br>NA       | NA<br>12/23 (52)   | 61/79 (77)<br>11/23 (48) | 30/79 (38)<br>NA               |
| France                                                                         | All Therapies                                                                                                     | 27              | 10/18 (56)              | 4/18 (22)              | 13/24 (54)         | 15/42 (36)               | 15/42 (36)                     |
| MDACC                                                                          | All Therapies                                                                                                     | 43              | 16/73 (22)              | 29/73 (40)             | NA                 | 28/73 (38)               | NA                             |
| TAFRO CRs                                                                      | All Therapies                                                                                                     | 49              | 41/98 (42)              | 16/98 (16)             | 8/98 (8)           | 33/98 (34)               | 52/98 (53)                     |
| <b>Corticosteroid Monotherapy</b>                                              |                                                                                                                   | <b>117</b>      | <b>17/97 (18)</b>       | <b>3/51 (6)</b>        | <b>11/42 (26)</b>  | <b>61/114 (54)</b>       | <b>62/115 (54)</b>             |
| SLR-1st                                                                        | Corticosteroid monotherapy                                                                                        | 47              | 12/44 (27)              | 21/44 (48)             | NA                 | 11/44 (25)               | 21/45 (47)                     |
| SLR-2nd                                                                        | Corticosteroid monotherapy                                                                                        | 2               | 1/2 (50)                | 1/2 (50)               | NA                 | 0/2 (0)                  | 1/2 (50)                       |
| Siltux - Phase II                                                              | Corticosteroid monotherapy (part of best<br>supportive care)                                                      | 26              | 0/26 (0)                | 0/26 (0)               | NA                 | 26/26 (100)              | 14/26 (54)                     |
| France                                                                         | Corticosteroid monotherapy                                                                                        | 17              | NA                      | NA                     | 9/17 (53)          | 8/17 (47)                | 8/17 (47)                      |
| TAFRO CRs                                                                      | Corticosteroid monotherapy                                                                                        | 25              | 4/25 (16)               | 3/25 (12)              | 2/25 (8)           | 16/25 (64)               | 18/25 (72)                     |
| <b>Corticosteroid or Cytotoxic Chemotherapy, Not distinguished<br/>(MDACC)</b> |                                                                                                                   | <b>19</b>       | <b>2/19 (11)</b>        | <b>10/19 (53)</b>      | <b>NA</b>          | <b>7/19 (37)</b>         | <b>NA</b>                      |
| <b>Cytotoxic Chemotherapy, Any Time Used</b>                                   |                                                                                                                   | <b>135</b>      | <b>51/124 (41)</b>      | <b>20/58 (34)</b>      | <b>7/35 (20)</b>   | <b>29/131 (22)</b>       | <b>44/105 (42)</b>             |
| SLR-1st                                                                        | Cytotoxic chemotherapy (any time used)<br>> Cyclophosphamide-regimen (any time used,<br>including with rituximab) | 47<br>23        | 19/43 (44)<br>9/22 (41) | 16/43 (37)<br>NA       | NA<br>NA           | 8/43 (19)<br>NA          | 19/43 (44)<br>9/21 (43)        |
| SLR-1st                                                                        | > Rituximab (without a cytotoxic agent)<br>> Non-cyclophosphamide based cytotoxic<br>regimen                      | 9<br>12         | 5/8 (63)<br>5/11 (45)   | NA<br>NA               | NA<br>NA           | NA<br>NA                 | 1/8 (13)<br>7/12 (58)          |
| SLR-1st                                                                        | > Chemotherapy with radiation therapy                                                                             | 2               | 0/1 (0)                 | NA                     | NA                 | NA                       | 1/1 (100)                      |
| SLR-1st                                                                        | > Chemotherapy NOS                                                                                                | 1               | 0/1 (0)                 | NA                     | NA                 | NA                       | 1/1 (100)                      |
| SLR-2nd                                                                        | Cytotoxic chemotherapy (any time used)<br>Cyclophosphamide-based cytotoxic<br>chemotherapy                        | 23<br>14        | 9/23 (39)<br>9/14 (64)  | 8/23 (35)<br>2/14 (14) | NA<br>2/14 (14)    | 6/23 (26)<br>1/14 (7)    | 12/22 (55)<br>4/14 (29)        |

|           |                                                                         |    |           |            |           |           |           |
|-----------|-------------------------------------------------------------------------|----|-----------|------------|-----------|-----------|-----------|
| TAFRO CRs | Rituximab with a cytotoxic agent                                        | 1  | 1/1 (100) | 0/1 (0)    | 0/1 (0)   | 0/1 (0)   | 0/1 (0)   |
| MDACC     | Rituximab with or without a cytotoxic agent                             | 25 | 5/25 (20) | 12/25 (48) | NA        | 8/25 (32) | NA        |
| TAFRO CRs | Rituximab without a cytotoxic agent                                     | 10 | 7/10 (70) | 1/10 (10)  | 1/10 (10) | 1/10 (10) | 4/10 (40) |
| France    | Rituximab without a cytotoxic agent                                     | 7  | NA        | NA         | 4/7 (57)  | 3/7 (43)  | 3/7 (43)  |
| France    | Non-cyclophosphamide, non-rituximab based cytotoxic regimen (etoposide) | 5  | 0/5 (0)   | 4/5 (80)   | NA        | 1/5 (20)  | 1/5 (20)  |
| TAFRO CRs | Non-cyclophosphamide, non-rituximab based cytotoxic regimen             | 3  | 1/3 (33)  | 1/3 (33)   | 0/3 (0)   | 1/3 (33)  | 1/3 (33)  |

|                                              |  |            |                    |                   |                   |                    |                    |
|----------------------------------------------|--|------------|--------------------|-------------------|-------------------|--------------------|--------------------|
| <b>Anti-IL-6 mAb Without Cytotoxic Agent</b> |  | <b>147</b> | <b>43/121 (36)</b> | <b>29/95 (31)</b> | <b>12/23 (52)</b> | <b>56/144 (39)</b> | <b>32/100 (32)</b> |
|----------------------------------------------|--|------------|--------------------|-------------------|-------------------|--------------------|--------------------|

|                   |                                                   |    |             |            |            |            |            |
|-------------------|---------------------------------------------------|----|-------------|------------|------------|------------|------------|
| SLR-1st           | Anti-IL-6 mAb (only when without cytotoxic agent) | 11 | 10/11 (91)  | 1/11 (9)   | NA         | 0/11 (0)   | 2/11 (18)  |
| SLR-1st           | > Tocilizumab with or without corticosteroids     | 9  | 8/9 (89)    | NA         | NA         | NA         | 1/9 (11)   |
| SLR-1st           | > Siltuximab with or without corticosteroids      | 2  | 2/2 (100)   | NA         | NA         | NA         | 1/2 (50)   |
| SLR-2nd           | Anti-IL-6 mAb (only when without cytotoxic agent) | 5  | 2/5 (40)    | NA         | NA         | NA         | 2/5 (40)   |
| Toci - Open label | Tocilizumab with or without corticosteroids       | 26 | NA          | NA         | 12/23 (52) | 11/23 (48) | NA         |
| France            | Tocilizumab with or without corticosteroids       | 10 | 10/10 (100) | 0/10 (0)   | NA         | 0/10 (0)   | 1/10 (10)  |
| TAFRO CRs         | Tocilizumab with or without corticosteroids       | 20 | 10/20 (50)  | 5/20 (25)  | 0/20 (0)   | 5/20 (25)  | 10/20 (50) |
| Siltux - Phase II | Siltuximab with or without corticosteroids        | 53 | 1/53 (2)    | 17/53 (32) | NA         | 35/53 (66) | 16/53 (30) |
| MDACC             | Siltuximab with or without corticosteroids        | 21 | 9/21 (43)   | 7/21 (33)  | NA         | 5/21 (24)  | NA         |
| TAFRO CRs         | Siltuximab with or without corticosteroids        | 1  | 1/1 (100)   | 0/1 (0)    | 0/1 (0)    | 0/1 (0)    | 1/1 (100)  |

|                                                 |  |           |                  |                 |                  |                  |                   |
|-------------------------------------------------|--|-----------|------------------|-----------------|------------------|------------------|-------------------|
| <b>Immunomodulators Without Cytotoxic Agent</b> |  | <b>27</b> | <b>9/26 (35)</b> | <b>1/17 (6)</b> | <b>3/17 (18)</b> | <b>8/26 (31)</b> | <b>10/26 (38)</b> |
|-------------------------------------------------|--|-----------|------------------|-----------------|------------------|------------------|-------------------|

|           |                                                                       |   |          |          |          |          |          |
|-----------|-----------------------------------------------------------------------|---|----------|----------|----------|----------|----------|
| SLR-1st   | Immunomodulators (only when without cytotoxic agent)                  | 5 | 0/4 (0)  | 2/4 (50) | NA       | 2/4 (50) | 3/4 (75) |
| SLR-2nd   | Immunomodulators (only when without cytotoxic agent)                  | 5 | 2/5 (40) | 3/5 (60) | NA       | 0/5 (0)  | 0/5 (0)  |
| TAFRO CRs | Immunomodulators - Cyclosporine A (only when without cytotoxic agent) | 8 | 3/8 (38) | 0/8 (0)  | 3/8 (38) | 2/8 (25) | 2/8 (25) |
| TAFRO CRs | Immunomodulators - Others (only when without cytotoxic agent)         | 9 | 4/9 (44) | 1/9 (11) | 0/9 (0)  | 4/9 (44) | 5/9 (56) |

|              |  |           |                  |                 |           |                  |                   |
|--------------|--|-----------|------------------|-----------------|-----------|------------------|-------------------|
| <b>Other</b> |  | <b>16</b> | <b>3/13 (23)</b> | <b>3/7 (43)</b> | <b>NA</b> | <b>5/13 (38)</b> | <b>12/15 (80)</b> |
|--------------|--|-----------|------------------|-----------------|-----------|------------------|-------------------|

|         |        |   |           |          |    |          |          |
|---------|--------|---|-----------|----------|----|----------|----------|
| SLR-1st | Others | 3 | 1/1 (100) | 0/1 (0)  | NA | 0/1 (0)  | 1/3 (33) |
| SLR-2nd | Others | 6 | 1/5 (20)  | 2/5 (40) | NA | 2/5 (40) | 4/5 (80) |

|                                        |                             |           |                 |                 |           |                    |                   |
|----------------------------------------|-----------------------------|-----------|-----------------|-----------------|-----------|--------------------|-------------------|
| TAFRO CRs                              | Others                      | 7         | 1/7 (14)        | 3/7 (43)        | 0/7 (0)   | 3/7 (43)           | 7/7 (100)         |
| <b>No Treatment/Follow Up Only</b>     |                             | <b>18</b> | <b>0/14 (0)</b> | <b>0/11 (0)</b> | <b>NA</b> | <b>14/14 (100)</b> | <b>11/14 (79)</b> |
| SLR-1st                                | No treatment/follow up only | 7         | 0/3 (0)         | 0/3 (0)         | NA        | 3/3 (100)          | 1/3 (33)          |
| France                                 | No treatment/follow up only | 3         | 0/3 (0)         | 0/3 (0)         | NA        | 3/3 (100)          | 2/3 (67)          |
| MDACC                                  | No treatment/follow up only | 8         | 0/8 (0)         | 0/8 (0)         | NA        | 8/8 (100)          | 8/8 (100)         |
| Total number of regimens evaluated (m) |                             | 479       |                 |                 |           |                    |                   |

**Supplementary Appendix 1. iMCD Clinical Case Series.** Literature review of published case reports, small series, and clinical trials were compiled to inform and substantiate the experience and opinion of the CDCN Working Group authors. Cytotoxic chemotherapy regimens described may include the use of rituximab. n = number of subjects treated in each treatment regimen category; m = total number of regimens evaluated (479); m\* = number regimens assessed for stated outcome. CR, complete response; PR, partial response; Response, response with depth undefined; NR, no response. Source Data: SLR-1st, systematic literature review - first line therapy<sup>1</sup>; SLR-2nd, systematic literature review - second line therapy<sup>1</sup>; Siltux Phase II, siltuximab Phase II clinical trial<sup>2</sup>; Toci - Open Label, tocilizumab open label reports<sup>3</sup>; France, report by French group<sup>4</sup>; MDACC, report by MD Anderson Cancer Center<sup>5</sup>; TAFRO CRs, TAFRO case reports.<sup>6-48</sup>

1. Liu AY, Nabel CS, Finkelman BS, et al: Idiopathic Multicentric Castleman's Disease: A Systematic Literature Review. *Lancet Haematol* 3:e163-75, 2016
2. van Rhee F, Wong RS, Munshi N, et al: Siltuximab for Multicentric Castleman's Disease: A Randomised, Double-blind, Placebo-controlled Trial. *Lancet Oncol* 15:966-74, 2014
3. Nishimoto N, Kanakura Y, Aozasa K, et al: Humanized Anti-interleukin-6 Receptor Antibody Treatment of Multicentric Castleman Disease. *Blood* 106:2627-32, 2005
4. Oksenhendler E, Boutboul D, Fajgenbaum D, et al: The Full Spectrum of Castleman Disease: 273 Patients Studied Over 20 Years. *British Journal of Haematology* 180:206-216, 2018
5. Yu L, Tu M, Cortes J, et al: Clinical and Pathological Characteristics of HIV- and HHV-8-negative Castleman Disease. *Blood* 129:1658-1668, 2017
6. Jain P, Verstovsek S, Loghavi S, et al: Durable Remission with Rituximab in a Patient with an Unusual Variant of Castleman's Disease with Myelofibrosis-TAFRO Syndrome. *American Journal of Hematology* 90:1091-2, 2015
7. Takasawa N, Sekiguchi Y, Takahashi T, et al: A Case of TAFRO Syndrome, a Variant of Multicentric Castleman's Disease, Successfully Treated with Corticosteroid and Cyclosporine A. *Modern Rheumatology*:1-5, 2016
8. Yasuda S, Tanaka K, Ichikawa A, et al: Aggressive TAFRO Syndrome with Reversible Cardiomyopathy Successfully Treated with Combination Chemotherapy. *International Journal of Hematology* 104:512-8, 2016
9. Sakai K, Maeda T, Kuriyama A, et al: TAFRO Syndrome Successfully Treated with Tocilizumab: A Case Report and Systematic Review. *Modern Rheumatology*:1-6, 2016

10. Lee FC, Merchant SH: Alleviation of Systemic Manifestations of Multicentric Castleman's Disease by Thalidomide. *Am J Hematol* 73:48-53, 2003
11. Starkey CR, Joste NE, Lee FC: Near-Total Resolution of Multicentric Castleman Disease by Prolonged Treatment with Thalidomide. *American Journal of Hematology* 81:303-4, 2006
12. Liu J, Han S, Ding J, et al: COX2-related Multicentric Mixed-type Castleman's Disease in a Young Man. *Nat Clin Pract Oncol* 2:370-5; quiz 376, 2005
13. Fujiwara S, Mochinaga H, Nakata H, et al: Successful Treatment of TAFRO Syndrome, a Variant Type of Multicentric Castleman Disease with Thrombotic Microangiopathy, with Anti-IL-6 receptor Antibody and Steroids. *International Journal of Hematology* 103:718-23, 2016
14. Konishi Y, Takahashi S, Nishi K, et al: Successful Treatment of TAFRO Syndrome, a Variant of Multicentric Castleman's Disease, with Cyclosporine A: Possible Pathogenetic Contribution of Interleukin-2. *The Tohoku Journal of Experimental Medicine* 236:289-95, 2015
15. Sakashita K, Murata K, Inagaki Y, et al: An Anterior Mediastinal Lesion in TAFRO Syndrome Showing Complete Remission After Glucocorticoid and Tocilizumab Therapy. *Respirology Case Reports* 4, 2016
16. Tadokoro A, Kanaji N, Hara T, et al: An Uncharted Constellation: TAFRO Syndrome. *The American Journal of Medicine* 129:938-41, 2016
17. Smith C, Lee-Miller C, Dishop MK, et al: Multicentric Castleman Disease Presenting with Fever. *The Journal of Pediatrics* 165:1261-5, 2014
18. Baserga M, Rosin M, Schoen M, et al: Multifocal Castleman Disease in Pediatrics: Case Report. *J Pediatr Hematol Oncol* 27:666-9, 2005
19. Honda Y, Endo Y, Tanizaki H, et al: Calciphylaxis Associated with Acute Renal Failure in Multicentric Castleman's Disease. *European Journal of Dermatology* 25:497-9, 2015
20. Tatekawa S, Umemura K, Fukuyama R, et al: Thalidomide for Tocilizumab-resistant Ascites with TAFRO Syndrome. *Clinical Case Reports* 3:472-8, 2015
21. Angenendt L, Kerkhoff A, Wiebe S, et al: Remissions of Different Quality Following Rituximab, Tocilizumab and Rituximab, and Allogeneic Stem Cell Transplantation in a Patient with Severe Idiopathic Multicentric Castleman's Disease. *Annals of Hematology* 94:1241-3, 2015
22. Kawashima M, Usui T, Okada H, et al: TAFRO Syndrome: 2 Cases and Review of the Literature. *Modern Rheumatology* 27:1093-1097, 2017
23. Simons M, Apor E, Butera JN, et al: TAFRO Syndrome Associated with EBV and Successful Triple Therapy Treatment: Case Report and Review of the Literature. *Case Reports in Hematology* 2016:4703608, 2016
24. Tedesco S, Postacchini L, Manfredi L, et al: Successful Treatment of a Caucasian Case of Multifocal Castleman's Disease with TAFRO Syndrome with a Pathophysiology Targeted Therapy - A Case Report. *Experimental Hematology & Oncology* 4:3, 2015
25. Koduri PR, Parvez M, Kaza S, et al: Castleman-Kojima Disease in a South Asian Adolescent. *Journal of Clinical and Experimental Hematopathology* 54:163-6, 2014
26. Kubokawa I, Yachie A, Hayakawa A, et al: The First Report of Adolescent TAFRO Syndrome, a Unique Clinicopathologic Variant of Multicentric Castleman's Disease. *BMC Pediatrics* 14:139, 2014
27. Abdo L, Morin C, Collarino R, et al: First European Case of TAFRO Syndrome Associated with Sjogren Disease. *American Journal of Internal Medicine* 2:102-105, 2014
28. Ozawa T, Kosugi S, Kito M, et al: [Efficacy of Rituximab for TAFRO Syndrome, a Variant Type of Multicentric Castleman's Disease]. [Rinsho ketsueki] *The Japanese Journal of Clinical Hematology* 55:350-5, 2014
29. Kawabata H, Kotani S, Matsumura Y, et al: Successful Treatment of a Patient with Multicentric Castleman's Disease who Presented with Thrombocytopenia, Ascites, Renal Failure and Myelofibrosis Using Tocilizumab, an Anti-interleukin-6 Receptor Antibody. *Internal Medicine (Tokyo, Japan)* 52:1503-7, 2013

30. Inoue M, Ankou M, Hua J, et al: Complete Resolution of TAFRO Syndrome (Thrombocytopenia, Anasarca, Fever, Reticulin Fibrosis and Organomegaly) After Immunosuppressive Therapies Using Corticosteroids and Cyclosporin A : A Case Report. *Journal of Clinical and Experimental Hematopathology* 53:95-9, 2013
31. Iwaki N, Sato Y, Takata K, et al: Atypical Hyaline Vascular-type Castleman's Disease with Thrombocytopenia, Anasarca, Fever, and Systemic Lymphadenopathy. *Journal of Clinical and Experimental Hematopathology* : JCEH 53:87-93, 2013
32. Masaki Y, Nakajima A, Iwao H, et al: Japanese Variant of Multicentric Castleman's Disease Associated with Serositis and Thrombocytopenia--A Report of Two Cases: Is TAFRO Syndrome (Castleman- Kojima Disease) a Distinct Clinicopathological Entity? *Journal of Clinical and Experimental Hematopathology* 53:79-85, 2013
33. Takai K, Nikkuni K, Shibuya H, et al: [Thrombocytopenia with Mild Bone Marrow Fibrosis Accompanied by Fever, Pleural Effusion, Ascites and Hepatosplenomegaly]. [Rinsho ketsueki] *The Japanese Journal of Clinical Hematology* 51:320-5, 2010
34. Takai K, Nikkuni K, Momoi A, et al: Thrombocytopenia with Reticulin Fibrosis Accompanied by Fever, Anasarca and Hepatosplenomegaly : A Clinical Report of Five Cases. *Journal of Clinical and Experimental Hematopathology* 53:63-8, 2013
35. Jouvray M, Terriou L, Meignin V, et al: [Pseudo-adult Still's Disease, Anasarca, Thrombotic Thrombocytopenic Purpura and Dysautonomia: An Atypical Presentation of Multicentric Castleman's Disease. Discussion of TAFRO Syndrome]. *La Revue de Medecine Interne* 37:53-7, 2016
36. Awano N, Inomata M, Sonoda Y, et al: A Case of Multicentric Castleman's Disease of Mixed-type, Which Showed Constellation of Symptoms, i.e., Thrombocytopenia, Anasarca, Anemia, Fever, Myelofibrosis, and Lymphadenopathy. *Journal of Clinical and Experimental Hematopathology* 53:101-5, 2013
37. Mutneja A, Cossey LN, Liapis H, et al: A Rare Case of Renal Thrombotic Microangiopathy Associated with Castleman's Disease. *BMC Nephrology* 18:57, 2017
38. Seida A, Wada J, Morita Y, et al: Multicentric Castleman's Disease Associated with Glomerular Microangiopathy and MPGN-like Lesion: Does Vascular Endothelial Cell-derived Growth Factor Play Causative or Protective Roles in Renal Injury? *American Journal of Kidney Diseases* : The Official Journal of the National Kidney Foundation 43:E3-9, 2004
39. Ozawa Y, Yamamoto H, Yasuo M, et al: Two Patients with TAFRO Syndrome Exhibiting Strikingly Similar Anterior Mediastinal Lesions with Predominantly Fat Attenuation on Chest Computed Tomography. *Respiratory Investigation* 55:176-180, 2017
40. Hiramatsu S, Ohmura K, Tsuji H, et al: Successful Treatment by Rituximab in a Patient with TAFRO Syndrome with Cardiomyopathy. *Nihon Rinsho Men'eki Gakkai kaishi = Japanese Journal of Clinical Immunology* 39:64-71, 2016
41. Alhoulaiby S, Ahmad B, Alrstom A, et al: Castleman's Disease with TAFRO Syndrome: A Case Report from Syria. *Oxford Medical Case Reports* 2017:omx021, 2017
42. Hou T, Dhillon J, Xiao W, et al: TAFRO Syndrome: A Case Report and Review of the Literature. *Human Pathology: Case Reports* 10:1-4, 2017
43. Jose FF, Kerbauy LN, Perini GF, et al: A Life-threatening Case of TAFRO Syndrome with Dramatic Response to Tocilizumab, Rituximab, and Pulse Steroids: The First Case Report in Latin America. *Medicine* 96:e6271, 2017
44. Okumura M, Ujiro A, Otsuka Y, et al: Cardiac Arrest Caused by Rapidly Increasing Ascites in a Patient with TAFRO Syndrome: A Case Report. *Acute Medicine & Surgery* 4:344-348, 2017
45. Coutier F, Meaux Ruault N, Crepin T, et al: A Comparison of TAFRO Syndrome Between Japanese and non-Japanese Cases: A Case Report and Literature Review. *Annals of Hematology* 97:401-407, 2018
46. Behnia F, Elojeimy S, Matesan M, et al: Potential Value of FDG PET-CT in Diagnosis and Follow-up of TAFRO Syndrome. *Annals of Hematology* 96:497-500, 2017

47. Zhou X, Wei J, Lou Y, et al: Salvage Therapy with Lenalidomide Containing Regimen for Relapsed/Refractory Castleman Disease: A Report of Three Cases. *Frontiers of Medicine* 11:287-292, 2017

48. Takayama Y, Kubota T, Ogino Y, et al: TAFRO Syndrome with Disseminated Intravascular Coagulation Successfully Treated with Tocilizumab and Recombinant Thrombomodulin. *Internal Medicine (Tokyo, Japan)*, 2017

| <b>Therapy</b>                                                                | <b>Patients (n)</b> | <b>Response (%)</b> | <b>No Response (%)</b> | <b>Treatment Failure (%)</b> |
|-------------------------------------------------------------------------------|---------------------|---------------------|------------------------|------------------------------|
| <b>All Therapies</b>                                                          | 49                  | 65/98 (66)          | 33/98 (34)             | 52/98 (53)                   |
| <b>Corticosteroid Monotherapy</b>                                             | 25                  | 9/25 (36)           | 16/25 (64)             | 18/25 (72)                   |
| <b>Cyclophosphamide-based cytotoxic chemotherapy</b>                          | 14                  | 13/14 (93)          | 1/14 (7)               | 4/14 (29)                    |
| <b>Rituximab with Cytotoxic Agent</b>                                         | 1                   | 1/1 (100)           | 0/1 (0)                | 0/1 (0)                      |
| <b>Rituximab without Cytotoxic Agent</b>                                      | 10                  | 9/10 (90)           | 1/10 (10)              | 4/10 (40)                    |
| <b>Cytotoxic Regimen (without Cyclophosphamide or Rituximab)</b>              | 3                   | 2/3 (67)            | 1/3 (33)               | 1/3 (33)                     |
| <b>Tocilizumab with or without Steroids</b>                                   | 20                  | 15/20 (75)          | 5/20 (25)              | 10/20 (50)                   |
| <b>Siltuximab with or without Steroids</b>                                    | 1                   | 1/1 (100)           | 0/1 (0)                | 1/1 (100)                    |
| <b>Cyclosporine A (without Cytotoxic Agent)</b>                               | 8                   | 6/8 (75)            | 2/8 (25)               | 2/8 (25)                     |
| <b>Immunomodulators – Other than Cyclosporine A (without Cytotoxic Agent)</b> | 9                   | 5/9 (56)            | 4/9 (44)               | 5/9 (56)                     |
| <b>Other</b>                                                                  | 7                   | 4/7 (57)            | 3/7 (43)               | 7/7 (100)                    |

**Supplementary Appendix 2. iMCD-TAFRO Cases.** These were compiled from published case reports and small series. n = number of subjects treated in each treatment regimen category, with a total of 98 regimens evaluated. Other includes: plasma exchange (n=3), plasma exchange + corticosteroids (n=2), Polymyxin B-immobilized fiber column direct hemoperfusion and cytokine absorption (n=1), allogeneic stem cell transplant (n=1). Please refer to **Supplementary Appendix 1** for complete list of references.
